# Supplementary material
Source: HighWire-hosted journal article supplement (https://bmjopen.bmj.com/content/8/11/e024996)
Supplement: inline-supplementary-material-1 [file inline-supplementary-material-1.pdf]

## S1 An example of a case vignette from the prognostic test

### Case Vignette 1

Mrs Smith is a 44 year old woman. Two months ago she was diagnosed with metastatic adenocarcinoma from a probable lung primary (T4 N3 M1b). She received one cycle of chemotherapy with pemetrexed and cisplatin last month. Prior to being transferred to the hospice she had been admitted to St Mungo's District General Hospital with shortness of breath. She has a chest infection. Since her admission to the hospital she has refused any further palliative chemotherapy. She has a past medical history of chronic obstructive pulmonary disease.

Ten days ago she was transferred to St Swithin's hospice for terminal care. On admission her respiration rate was 18/min, her blood pressure was 101/66 mmHg, her temperature was 37.5 °C, and her O<sub>2</sub> saturation levels were 90% on room air. Her most recent observations, taken yesterday, can be seen below. On the day that you assess the patient her Palliative Performance Score is 60% and her Richmond Agitation and Sedation Score is 0. She is alert. She has noisy respiratory secretions due to her chest infection, occasional diarrhoea, and periods of extreme tiredness as well as occasional surges of energy. She is reporting mild pain which is controlled well with analgesics. She has no pressure sores. She is eating less due to a lack of appetite. Overall she is very pale and her skin is grey in colour. Mrs Smith is anxious but accepting of her death. The ward staff report that her general condition has been stable in the last 24 hours. She is not for cardio-pulmonary resuscitation. Recent blood tests results and her medication chart is available below.

| Medication Name | Admission (Day 1) |       |            | Assessment (Day 10) |       |            |
|-----------------|-------------------|-------|------------|---------------------|-------|------------|
|                 | Dose              | Route | Frequency  | Dose                | Route | Frequency  |
| <b>Regular</b>  |                   |       |            |                     |       |            |
| Amoxicillin     | 500mg             | PO    | TDS        | -                   | -     | -          |
| Cyclizine       | 50mg              | PO    | TDS        | 50mg                | PO    | TDS        |
| Ibuprofen       | 400mg             | PO    | TDS        | 400mg               | PO    | TDS        |
| Lansoprazole    | 15mg              | PO    | OD         | 15mg                | PO    | OD         |
| Paracetamol     | 1g                | PO    | QDS        | 1g                  | PO    | QDS        |
| Dexamethasone   | 8mg               | PO    | OD         | 8mg                 | PO    | OD         |
| Folic Acid      | 400mcg            | PO    | OD         | 400mcg              | PO    | OD         |
| Diazepam        | 2mg               | PO    | TDS        | 2mg                 | PO    | TDS        |
| Lorazepam       | 1mg               | PO    | OD         | -                   | -     | -          |
| Oramorph        | 20mg              | PO    | QDS        | -                   | -     | -          |
| Budesonide      | -                 | -     | -          | 1mg                 | NEB   | BD         |
| Lidocaine 5%    | -                 | -     | -          | 1 dose              | TOP   | BD         |
| Docusate Sodium | -                 | -     | -          | 200mg               | PO    | BD         |
| Senna           | -                 | -     | -          | 2 tabs              | PO    | BD         |
| Tazocin         | -                 | -     | -          | 4.6g                | IV    | TDS        |
| Midazolam       | 10mg              | PO    | STAT       | -                   | -     | -          |
| <b>PRN</b>      |                   |       |            |                     |       |            |
| Lorazepam       | -                 | -     | -          | 1mg                 | SL    | 2 / 24 hrs |
| Salbutamol      | 5mg x 2           | NEB   | 2 / 24 hrs | 2.5mg               | NEB   | 1 / 24 hrs |

Recent observations, taken yesterday:

Pulse 110bpm, blood pressure 117/79 mmHg, temperature 37.5 °C, and O<sub>2</sub> saturation 95% on 1L of oxygen.

| Test                 | Admission (Day 1) | Most Recent (Day 9) |                    |              |
|----------------------|-------------------|---------------------|--------------------|--------------|
|                      | Results           |                     | Unit               | Range        |
| HB                   | 86                | 62                  | g/L                | 130 to 180   |
| PLATELET             | 69                | 1178                | 10 <sup>9</sup> /L | 150 to 450   |
| MCV                  | 110               |                     | fL                 | 80 to 97     |
| NEUTROPHIL           | 5.1               | 27.1                | 10 <sup>9</sup> /L | 1.7 to 8.0   |
| Sodium               | 133               |                     | mmol/L             | 133 to 146   |
| Potassium            | 5.2               |                     | mmol/L             | 3.5 to 5.3   |
| Urea                 | 3.8               |                     | mmol/L             | 2.5 to 7.8   |
| Creatinine           | 44                |                     | umol/L             | 60 to 110    |
| Bilirubin            | 77                |                     | umol/L             | 0 to 21      |
| Alanine Transaminase | 33                |                     | U/L                | 0 to 52      |
| Alkaline Phosphase   | 973               |                     | U/L                | 30 to 130    |
| Albumin              | 34                |                     | g/L                | 35 to 50     |
| Phosphate            | 1.01              |                     | mmol/L             | 0.80 to 1.50 |
| Adjusted Calcium     | 2.41              |                     | mmol/L             | 2.20 to 2.60 |
| C Reactive Protein   | 56                |                     | mg/L               | 0.0 to 10.0  |

| PPS Level | Ambulation        | Activity & Evidence of Disease                                 | Self-Care                        | Intake            | Conscious Level              |
|-----------|-------------------|----------------------------------------------------------------|----------------------------------|-------------------|------------------------------|
| 100%      | Full              | Normal activity & work<br>No evidence of disease               | Full                             | Normal            | Full                         |
| 90%       | Full              | Normal activity & work<br>Some evidence of disease             | Full                             | Normal            | Full                         |
| 80%       | Full              | Normal activity <i>with</i> Effort<br>Some evidence of disease | Full                             | Normal or reduced | Full                         |
| 70%       | Reduced           | Unable Normal Job/Work<br>Significant disease                  | Full                             | Normal or reduced | Full                         |
| 60%       | Reduced           | Unable hobby/house work<br>Significant disease                 | Occasional assistance necessary  | Normal or reduced | Full or Confusion            |
| 50%       | Mainly Sit/Lie    | Unable to do any work<br>Extensive disease                     | Considerable assistance required | Normal or reduced | Full or Confusion            |
| 40%       | Mainly in Bed     | Unable to do most activity<br>Extensive disease                | Mainly assistance                | Normal or reduced | Full or Drowsy +/- Confusion |
| 30%       | Totally Bed Bound | Unable to do any activity<br>Extensive disease                 | Total Care                       | Normal or reduced | Full or Drowsy +/- Confusion |
| 20%       | Totally Bed Bound | Unable to do any activity<br>Extensive disease                 | Total Care                       | Minimal to sips   | Full or Drowsy +/- Confusion |
| 10%       | Totally Bed Bound | Unable to do any activity<br>Extensive disease                 | Total Care                       | Mouth care only   | Drowsy or Coma +/- Confusion |
| 0%        | Death             | -                                                              | -                                | -                 | -                            |

| Richmond Agitation Sedation Scale (RASS)                      |                   |                                                                                               |
|---------------------------------------------------------------|-------------------|-----------------------------------------------------------------------------------------------|
| Please circle which category currently represents the patient |                   |                                                                                               |
| +4                                                            | Combative         | Overtly combative, violent, immediate danger to staff                                         |
| +3                                                            | Very Agitated     | Pulls or removes tube(s) or catheter(s); aggressive                                           |
| +2                                                            | Agitated          | Frequent non-purposeful movement, fights ventilator                                           |
| +1                                                            | Restless          | Anxious but movements not aggressive vigorous                                                 |
| 0                                                             | Alert and Calm    |                                                                                               |
| -1                                                            | Drowsy            | Not fully alert, but has sustained awakening (eye-opening/eye contact) to voice (>10 seconds) |
| -2                                                            | Light Sedation    | Briefly awakens with eye contact to voice (<10 seconds)                                       |
| -3                                                            | Moderate Sedation | Movement or eye opening to voice (but no eye contact)                                         |
| -4                                                            | Deep sedation     | No response to voice, but movement or eye opening to physical stimulation                     |
| -5                                                            | Unarousable       | No response to voice or physical stimulation                                                  |
